# Supplementary material for: Enrichment Extraction and Activity Study of the Different Varieties of Hericium erinaceus against HCT-8 Colon Cancer Cells
Source: MDPI journal article supplement (doi:10.3390/molecules28176288), 2023-08-28
Supplement: s1 [file s1]

## Supplementary Materials

Table S1. 4916

| peak number | retention time (min) | peak area | peak area (%) | extraction rate (%)                                     |
|-------------|----------------------|-----------|---------------|---------------------------------------------------------|
| 1           | 6.895                | 486764    | 0.01          | 1-Butanol, 3-methyl-                                    |
| 2           | 9.050                | 342889    | 0.01          | 2-Propanone, 1-hydroxy-                                 |
| 3           | 9.825                | 368429    | 0.01          | 5-Hepten-2-one, 6-methyl-                               |
| 4           | 11.358               | 270713    | 0.00          | 2-Nonen-1-ol                                            |
| 5           | 11.531               | 285839    | 0.01          | 7-Oxabicyclo [2.2.1] heptane                            |
| 6           | 12.670               | 3727777   | 0.07          | Acetic acid                                             |
| 7           | 13.057               | 296581    | 0.01          | Furfural                                                |
| 8           | 14.145               | 285142    | 0.01          | Formic acid                                             |
| 9           | 15.869               | 108000    | 0.00          | 2-Furancarboxaldehyde, 5-methyl-                        |
| 10          | 16.110               | 1483783   | 0.03          | 2-Pentadecanol                                          |
| 11          | 16.265               | 65194     | 0.00          | 2-Undecanone                                            |
| 12          | 17.735               | 213756    | 0.00          | Pentanoic acid, heptyl ester                            |
| 13          | 22.010               | 872764    | 0.02          | Hexanoic acid                                           |
| 14          | 24.380               | 999930    | 0.02          | 1,3-Benzenediol, 2-methyl-                              |
| 15          | 25.674               | 3342850   | 0.06          | Tetrahydro-4H-pyran-4-ol                                |
| 16          | 25.920               | 1774002   | 0.03          | 1-Heptyn-6-one                                          |
| 17          | 26.071               | 4719299   | 0.08          | Isopropyl myristate                                     |
| 18          | 27.518               | 1199269   | 0.02          | 3-Methyl-3-oxetanemethanol                              |
| 19          | 28.189               | 971136    | 0.02          | 1,4-Cyclohexanediol, trans-                             |
| 20          | 28.703               | 576851    | 0.01          | 1,8(2H,5H)-Naphthalenedione, hexahydro-8a-methyl-, cis- |
| 21          | 28.782               | 1823830   | 0.03          | Nonanoic acid                                           |
| 22          | 29.221               | 526649    | 0.01          | l-Pantoil lactone                                       |
| 23          | 29.385               | 1249461   | 0.02          | 2-Hepten-4-one, 2-methyl-                               |
| 24          | 29.913               | 1543446   | 0.03          | Hexadecanoic acid, methyl ester                         |
| 25          | 30.635               | 18101478  | 0.32          | Hexadecanoic acid, ethyl ester                          |
| 26          | 31.665               | 31583898  | 0.56          | Glycerin                                                |
| 27          | 31.808               | 4989145   | 0.09          | Pentanoic acid, 4-oxo-                                  |
| 28          | 33.813               | 2685663   | 0.05          | 10-Octadecenoic acid, methyl ester                      |
| 29          | 34.049               | 5406416   | 0.10          | Pentadecanoic acid, ethyl ester                         |
| 30          | 34.147               | 2729895   | 0.05          | 2-Pentenoic acid, 4,4-dimethyl-, methyl ester           |
| 31          | 34.340               | 16056230  | 0.29          | (E)-9-Octadecenoic acid ethyl ester                     |
| 32          | 34.457               | 1371217   | 0.02          | 9-Octadecenoic acid, ethyl ester                        |
| 33          | 34.533               | 3550749   | 0.06          | 9,12-Octadecadienoic acid, methyl ester                 |
| 34          | 35.039               | 26070804  | 0.47          | 9,12-Octadecadienoic acid, ethyl ester                  |
| 35          | 35.331               | 1624682   | 0.03          | Benzeneacetic acid                                      |

|    |        |            |       |                                                       |
|----|--------|------------|-------|-------------------------------------------------------|
| 36 | 35.616 | 17666962   | 0.32  | 4-(Hydroxymethyl)-3-oxabicyclo<br>[3.1.0] hexan-2-one |
| 37 | 37.181 | 29171965   | 0.52  | Tridecanoic acid                                      |
| 38 | 38.042 | 4013191    | 0.07  | Linoelaidic acid                                      |
| 39 | 38.515 | 165661240  | 2.96  | Pentadecanoic acid                                    |
| 40 | 40.167 | 1123044609 | 20.04 | n-Hexadecanoic acid                                   |
| 41 | 40.578 | 52545417   | 0.94  | Cyclopentadecanone, 2-hydroxy-                        |
| 42 | 41.555 | 40566705   | 0.72  | cis-10-Heptadecenoic acid                             |
| 43 | 41.884 | 88848804   | 1.59  | 1,2,3,4-Butanetetrol, [S- (R*, R*)]-                  |
| 44 | 42.769 | 6645340    | 0.12  | 2,5-Monoformal-l-rhamnitol                            |
| 45 | 44.071 | 535422855  | 9.55  | Octadecanoic acid                                     |
| 46 | 44.819 | 1581105313 | 28.21 | 9-Octadecenoic acid                                   |
| 47 | 46.280 | 1818617729 | 32.45 | 9,12-Octadecadienoic acid (Z, Z)-                     |

Table S2. Gt

| peak<br>number | retention<br>time (min) | peak area | peak area<br>(%) | extraction rate (%)                                   |
|----------------|-------------------------|-----------|------------------|-------------------------------------------------------|
| 1              | 6.881                   | 347209    | 0.01             | 1-Butanol, 3-methyl-                                  |
| 2              | 9.018                   | 365272    | 0.01             | 2-Propanone, 1-hydroxy-                               |
| 3              | 9.827                   | 925557    | 0.01             | 5-Hepten-2-one, 6-methyl-                             |
| 4              | 11.369                  | 248029    | 0.00             | 2-Octene, 2-methyl-6-methylene-                       |
| 5              | 11.503                  | 452093    | 0.01             | 2(5H)-Furanone, 5-methyl-                             |
| 6              | 12.641                  | 4417068   | 0.06             | Acetic acid                                           |
| 7              | 13.044                  | 282391    | 0.00             | Furfural                                              |
| 8              | 14.092                  | 547143    | 0.01             | Formic acid                                           |
| 9              | 14.809                  | 400778    | 0.01             | Ethyl formate                                         |
| 10             | 15.808                  | 358455    | 0.01             | 2-Furancarboxaldehyde, 5-methyl-                      |
| 11             | 16.033                  | 614483    | 0.01             | 4-Cyclopentene-1,3-dione                              |
| 12             | 16.068                  | 879898    | 0.01             | Propylene Glycol                                      |
| 13             | 16.269                  | 265314    | 0.00             | 2-Cyclopenten-1-one, 4-methoxy-                       |
| 14             | 17.064                  | 1858121   | 0.03             | Butyrolactone                                         |
| 15             | 17.708                  | 822833    | 0.01             | 2-Furanmethanol                                       |
| 16             | 17.955                  | 1633558   | 0.02             | Butanoic acid, 3-methyl-                              |
| 17             | 19.790                  | 424748    | 0.01             | Heptasiloxane, hexadecamethyl-                        |
| 18             | 21.966                  | 1864352   | 0.03             | Hexanoic acid                                         |
| 19             | 24.335                  | 1934804   | 0.03             | 1,3-Benzenediol, 2-methyl-                            |
| 20             | 25.624                  | 10054907  | 0.15             | 2-Deoxy-2-fluoro-1,6-anhydro-beta-d-<br>glucopyranose |
| 21             | 25.868                  | 1533625   | 0.02             | 2-Hexanone, 5-methyl-                                 |
| 22             | 26.042                  | 2707842   | 0.04             | 3-Octen-2-ol                                          |
| 23             | 27.472                  | 1329496   | 0.02             | 1-Penten-3-ol, 4-methyl-                              |

---

|    |        |            |       |                                               |
|----|--------|------------|-------|-----------------------------------------------|
| 24 | 28.136 | 978594     | 0.01  | 1,4-Cyclohexanediol, trans-                   |
| 25 | 28.668 | 1513906    | 0.02  | 1,8(2H,5H)-Naphthalenedione,                  |
| 26 | 28.750 | 2839852    | 0.04  | hexahydro-8a-methyl-, cis-                    |
| 27 | 29.175 | 734714     | 0.01  | Nonanoic acid                                 |
| 28 | 29.348 | 1412213    | 0.02  | Cyclopropanemethanol, alpha-butyl-            |
| 29 | 29.855 | 1067046    | 0.02  | 3-Decen-5-one                                 |
| 30 | 30.596 | 36115307   | 0.53  | Hexadecanoic acid, methyl ester               |
| 31 | 31.674 | 6491996    | 0.95  | Hexadecanoic acid, ethyl ester                |
| 32 | 33.781 | 2237877    | 0.03  | Glycerin                                      |
| 33 | 34.030 | 9915890    | 0.15  | 7-Octadecenoic acid, methyl ester             |
| 34 | 34.114 | 3737379    | 0.05  | Pentadecanoic acid, ethyl ester               |
| 35 | 34.322 | 48362313   | 0.71  | 2-Pentenoic acid, 4,4-dimethyl-, methyl ester |
| 36 | 34.435 | 5916338    | 0.09  | 9-Octadecenoic acid, ethyl ester              |
| 37 | 34.505 | 2192788    | 0.03  | (E)-9-Octadecenoic acid ethyl ester           |
| 38 | 35.024 | 68417657   | 1.00  | 9,12-Octadecadienoic acid, methyl ester       |
| 39 | 35.294 | 1836026    | 0.03  | 9,12-Octadecadienoic acid, ethyl ester        |
| 40 | 35.578 | 28094111   | 0.41  | Benzeneacetic acid                            |
| 41 | 37.153 | 43090866   | 0.63  | 1,2-Ethanediol, 1-(2-furanyl)-                |
| 42 | 37.628 | 5178196    | 0.08  | Tetradecanoic acid                            |
| 43 | 38.052 | 6891512    | 0.10  | Fumaric acid, ethyl 2-methylallyl ester       |
| 44 | 38.490 | 210022458  | 3.08  | Pentyl linoleate                              |
| 45 | 40.132 | 1426244091 | 20.92 | Pentadecanoic acid                            |
| 46 | 40.579 | 81777002   | 1.20  | n-Hexadecanoic acid                           |
| 47 | 41.524 | 42465957   | 0.62  | Cyclopentadecanone, 2-hydroxy-                |
| 48 | 41.951 | 171168240  | 2.51  | cis-10-Heptadecenoic acid                     |
| 49 | 42.756 | 15852389   | 0.23  | 1,2,3,4-Butanetetrol, [S- (R*, R*)]-          |
| 50 | 44.099 | 676289827  | 9.92  | 2,5-Monoformal-l-rhamnitol                    |
| 51 | 44.840 | 1848316213 | 27.11 | Octadecanoic acid                             |
| 52 | 46.280 | 1974996898 | 28.97 | 9-Octadecenoic acid                           |
|    |        |            |       | 9,12-Octadecadienoic acid (Z, Z)-             |

---

Table S3. He3

| peak number | retention time (min) | peak area | peak area (%) | extraction rate (%)                                |
|-------------|----------------------|-----------|---------------|----------------------------------------------------|
| 1           | 12.679               | 828152    | 0.04          | Acetic acid                                        |
| 2           | 16.100               | 268067    | 0.01          | Propylene Glycol                                   |
| 3           | 22.002               | 975128    | 0.05          | Heptanoic acid                                     |
| 4           | 24.306               | 285640    | 0.01          | Octanoic acid                                      |
| 5           | 26.076               | 1156547   | 0.05          | 3-Octen-2-ol                                       |
| 6           | 27.508               | 361919    | 0.02          | 1-Penten-3-ol, 4-methyl-                           |
| 7           | 28.158               | 436196    | 0.02          | 1,4-Cyclohexanediol, trans-                        |
| 8           | 28.783               | 1529778   | 0.07          | Nonanoic acid                                      |
| 9           | 29.426               | 570664    | 0.03          | 2-Hepten-4-one, 2-methyl-                          |
| 10          | 29.936               | 1347940   | 0.06          | Hexadecanoic acid, methyl ester                    |
| 11          | 30.647               | 5409954   | 0.26          | Hexadecanoic acid, ethyl ester                     |
| 12          | 31.607               | 3346093   | 0.16          | Glycerin                                           |
| 13          | 31.793               | 887368    | 0.04          | Pentanoic acid, 4-oxo-                             |
| 14          | 32.113               | 540937    | 0.03          | 1,3-Propanediol, 2-ethyl-2-(hydroxymethyl)-        |
| 15          | 34.032               | 1114184   | 0.05          | Pentadecanoic acid, ethyl ester                    |
| 16          | 34.130               | 528165    | 0.02          | 2-Pentenoic acid, 4,4-dimethyl-, methyl ester      |
| 17          | 34.322               | 4990194   | 0.24          | (E)-9-Octadecenoic acid ethyl ester                |
| 18          | 34.519               | 2688820   | 0.13          | 9,12-Octadecadienoic acid, methyl ester            |
| 19          | 35.017               | 6887708   | 0.33          | 9,12-Octadecadienoic acid, ethyl ester             |
| 20          | 35.311               | 426563    | 0.02          | Benzeneacetic acid                                 |
| 21          | 35.597               | 2614355   | 0.12          | 4-(Hydroxymethyl)-3-oxabicyclo [3.1.0] hexan-2-one |
| 22          | 37.181               | 9620612   | 0.45          | Benzene, 1,1'-[1,2-ethanediylbis(oxy)]bis-         |
| 23          | 37.645               | 1882419   | 0.09          | Fumaric acid, ethyl 2-methylallyl ester            |
| 24          | 38.473               | 63564412  | 3.00          | Pentadecanoic acid                                 |
| 25          | 40.018               | 544555993 | 25.70         | n-Hexadecanoic acid                                |
| 26          | 40.489               | 15083934  | 0.71          | 9-Hexadecenoic acid                                |
| 27          | 41.510               | 2117232   | 0.10          | 6-Octadecenoic acid, (Z)-                          |
| 28          | 41.602               | 4221377   | 0.20          | Heptadecanoic acid                                 |
| 29          | 43.754               | 126126175 | 5.95          | Octadecanoic acid                                  |
| 30          | 44.486               | 545454110 | 25.74         | 6-Octadecenoic acid, (Z)-                          |
| 31          | 45.875               | 769222734 | 36.30         | 9,12-Octadecadienoic acid (Z, Z)-                  |

Table S4. He12

| peak number | retention time (min) | peak area | peak area (%) | extraction rate (%)                                |
|-------------|----------------------|-----------|---------------|----------------------------------------------------|
| 1           | 6.874                | 90581     | 0.00          | 1-Butanol, 3-methyl-                               |
| 2           | 12.670               | 1788929   | 0.04          | Acetic acid                                        |
| 3           | 16.077               | 433468    | 0.01          | 4-Penten-2-ol                                      |
| 4           | 17.097               | 747763    | 0.02          | Butyrolactone                                      |
| 5           | 17.915               | 428410    | 0.01          | Butanoic acid, 3-methyl-                           |
| 6           | 21.988               | 1098910   | 0.02          | Hexanoic acid                                      |
| 7           | 25.648               | 1002646   | 0.02          | 2-Deoxy-2-fluoro-1,6-anhydro-beta-d-glucopyranose  |
| 8           | 25.887               | 2324758   | 0.05          | 2-Hexanone, 5-methyl-                              |
| 9           | 26.055               | 2239833   | 0.05          | 3-Octen-2-ol                                       |
| 10          | 26.872               | 462137    | 0.01          | 3-Octen-2-ol                                       |
| 11          | 27.495               | 857627    | 0.02          | 3-Methyl-3-oxetanemethanol                         |
| 12          | 27.907               | 653030    | 0.01          | Pentanal, 3-hydroxy-2-methyl-                      |
| 13          | 28.156               | 728900    | 0.02          | 1,4-Cyclohexanediol, trans-                        |
| 14          | 28.755               | 3674673   | 0.08          | Nonanoic acid                                      |
| 15          | 29.183               | 755787    | 0.02          | Cyclopropanemethanol, alpha-butyl-                 |
| 16          | 29.394               | 1169456   | 0.03          | 3-Decen-5-one                                      |
| 17          | 29.916               | 1014995   | 0.02          | Hexadecanoic acid, methyl ester                    |
| 18          | 30.629               | 8647954   | 0.19          | Hexadecanoic acid, ethyl ester                     |
| 19          | 31.683               | 2647701   | 0.06          | Glycerin                                           |
| 20          | 31.790               | 1589860   | 0.04          | Pentanoic acid, 4-oxo-                             |
| 21          | 33.796               | 2848133   | 0.06          | 10-Octadecenoic acid, methyl ester                 |
| 22          | 34.030               | 2077386   | 0.05          | Pentadecanoic acid, ethyl ester                    |
| 23          | 34.324               | 15079909  | 0.33          | 9-Octadecenoic acid, ethyl ester                   |
| 24          | 34.446               | 1391849   | 0.03          | (E)-9-Octadecenoic acid ethyl ester                |
| 25          | 34.518               | 2311661   | 0.05          | 9,12-Octadecadienoic acid, methyl ester            |
| 26          | 35.022               | 17958824  | 0.40          | 9,12-Octadecadienoic acid, ethyl ester             |
| 27          | 35.301               | 2310193   | 0.05          | Benzeneacetic acid                                 |
| 28          | 35.595               | 4008107   | 0.09          | 4-(Hydroxymethyl)-3-oxabicyclo [3.1.0] hexan-2-one |
| 29          | 37.175               | 28045996  | 0.62          | Benzene, 1,1'-[1,2-ethanediylbis(oxy)]bis-         |
| 30          | 37.633               | 3045988   | 0.07          | Fumaric acid, 2,4-dimethylpent-3-yl ethyl ester    |
| 31          | 38.005               | 5243457   | 0.12          | Isopropyl linoleate                                |
| 32          | 38.473               | 106685682 | 2.36          | Pentadecanoic acid                                 |
| 33          | 40.082               | 836370806 | 18.48         | n-Hexadecanoic acid                                |
| 34          | 40.509               | 28879767  | 0.64          | cis-10-Heptadecenoic acid                          |
| 35          | 41.600               | 19922236  | 0.44          | Heptadecanoic acid                                 |

|    |        |            |       |                                   |
|----|--------|------------|-------|-----------------------------------|
| 36 | 43.933 | 349856077  | 7.73  | Octadecanoic acid                 |
| 37 | 44.724 | 1499091483 | 33.13 | 6-Octadecenoic acid, (Z)-         |
| 38 | 46.119 | 1567152196 | 34.64 | 9,12-Octadecadienoic acid (Z, Z)- |

**Table S5. He13**

| peak number | retention time (min) | peak area | peak area (%) | extraction rate (%)                           |
|-------------|----------------------|-----------|---------------|-----------------------------------------------|
| 1           | 6.820                | 72213     | 0.00          | 2-Pentene                                     |
| 2           | 8.986                | 236891    | 0.01          | 2-Propanone, 1-hydroxy-                       |
| 3           | 9.798                | 146978    | 0.00          | 5-Hepten-2-one, 6-methyl-                     |
| 4           | 9.873                | 105628    | 0.00          | Propanoic acid, 2-hydroxy-, ethyl ester, (L)- |
| 5           | 11.511               | 254992    | 0.01          | 2-Carene                                      |
| 6           | 12.662               | 1611773   | 0.04          | Acetic acid                                   |
| 7           | 14.142               | 448057    | 0.01          | Formic acid                                   |
| 8           | 16.092               | 249336    | 0.01          | R-(-)-1,2-propanediol                         |
| 9           | 17.089               | 609995    | 0.02          | Butyrolactone                                 |
| 10          | 21.996               | 547774    | 0.01          | Hexanoic acid                                 |
| 11          | 24.362               | 474672    | 0.01          | 1,3-Benzenediol, 2-methyl-                    |
| 12          | 25.540               | 227816    | 0.01          | Octanoic acid, octyl ester                    |
| 13          | 25.652               | 304545    | 0.01          | 1,3-Pentenediol, 2,2,4-trimethyl-             |
| 14          | 25.899               | 625105    | 0.02          | 1-Heptyn-6-one                                |
| 15          | 26.074               | 5308535   | 0.14          | Isopropyl myristate                           |
| 16          | 27.505               | 765147    | 0.02          | 3-Methyl-3-oxetanemethanol                    |
| 17          | 28.165               | 614823    | 0.02          | 1,4-Cyclohexanediol, trans-                   |
| 18          | 28.603               | 817170    | 0.02          | Pentadecanoic acid, ethyl ester               |
| 19          | 28.756               | 1244215   | 0.03          | Nonanoic acid                                 |
| 20          | 29.404               | 821028    | 0.02          | 3-Decen-5-one                                 |
| 21          | 29.911               | 754785    | 0.02          | Hexadecanoic acid, methyl ester               |
| 22          | 30.628               | 8861917   | 0.23          | Hexadecanoic acid, ethyl ester                |
| 23          | 31.620               | 11098162  | 0.29          | Glycerin                                      |
| 24          | 33.795               | 1597819   | 0.04          | 10-Octadecenoic acid, methyl ester            |
| 25          | 34.029               | 2388520   | 0.06          | Pentadecanoic acid, ethyl ester               |
| 26          | 34.128               | 2744436   | 0.07          | 2-Pentenoic acid, 4,4-dimethyl-, methyl ester |
| 27          | 34.324               | 11270695  | 0.29          | 9-Octadecenoic acid, ethyl ester              |
| 28          | 34.444               | 422258    | 0.01          | (E)-9-Octadecenoic acid ethyl ester           |
| 29          | 34.516               | 2415626   | 0.06          | 9,12-Octadecadienoic acid, methyl ester       |
| 30          | 35.021               | 19374968  | 0.51          | 9,12-Octadecadienoic acid, ethyl ester        |
| 31          | 35.311               | 859239    | 0.02          | Benzeneacetic acid                            |
| 32          | 35.592               | 13053460  | 0.34          | 2-Pentenoic acid, 3-methyl-, methyl ester     |

|    |        |            |       |                                            |
|----|--------|------------|-------|--------------------------------------------|
| 33 | 37.188 | 23385228   | 0.61  | Benzene, 1,1'-[1,2-ethanediylbis(oxy)]bis- |
| 34 | 37.650 | 2759931    | 0.07  | Fumaric acid, ethyl 2-methylallyl ester    |
| 35 | 37.999 | 1316974    | 0.03  | Pentyl linoleate                           |
| 36 | 38.485 | 111700001  | 2.91  | Pentadecanoic acid                         |
| 37 | 40.089 | 841848422  | 21.97 | n-Hexadecanoic acid                        |
| 38 | 40.515 | 25703556   | 0.67  | 9-Eicosenoic acid, (Z)-                    |
| 39 | 41.505 | 12910682   | 0.34  | Palmitoleic acid                           |
| 40 | 43.876 | 277427337  | 7.24  | Octadecanoic acid                          |
| 41 | 44.634 | 1026372386 | 26.78 | 9-Octadecenoic acid                        |
| 42 | 46.075 | 1418554073 | 37.02 | 9,12-Octadecadienoic acid (Z, Z)-          |

**Table S6. T3**

| peak number | retention time (min) | peak area | peak area (%) | extraction rate (%)                      |
|-------------|----------------------|-----------|---------------|------------------------------------------|
| 1           | 6.740                | 316956    | 0.01          | 1-Butanol, 3-methyl-                     |
| 2           | 12.641               | 2119383   | 0.07          | Acetic acid                              |
| 3           | 16.079               | 245363    | 0.01          | R-(-)-1,2-propanediol                    |
| 4           | 16.226               | 345587    | 0.01          | Dimethyl Sulfoxide                       |
| 5           | 17.107               | 297864    | 0.01          | Butanoic acid, 4-hydroxy-                |
| 6           | 17.916               | 296101    | 0.01          | Butanoic acid, 3-methyl-                 |
| 7           | 21.988               | 944381    | 0.03          | Hexanoic acid                            |
| 8           | 24.302               | 329613    | 0.01          | Heptanoic acid                           |
| 9           | 25.891               | 1764370   | 0.06          | 2-Hexanone, 4-hydroxy-5-methyl-3-propyl- |
| 10          | 26.059               | 1322547   | 0.04          | 3-Octen-2-ol                             |
| 11          | 27.490               | 481736    | 0.02          | 1-Penten-3-ol, 4-methyl-                 |
| 12          | 28.156               | 538430    | 0.02          | 1,4-Cyclohexanediol, trans-              |
| 13          | 28.755               | 2907563   | 0.09          | Nonanoic acid                            |
| 14          | 29.193               | 515262    | 0.02          | Cyclopropanemethanol, alpha-butyl-       |
| 15          | 29.394               | 1165265   | 0.04          | 2-Hepten-4-one, 2-methyl-                |
| 16          | 29.918               | 1426180   | 0.04          | Hexadecanoic acid, methyl ester          |
| 17          | 30.634               | 11045514  | 0.35          | Hexadecanoic acid, ethyl ester           |
| 18          | 31.625               | 7228173   | 0.23          | Glycerin                                 |
| 19          | 31.784               | 2632259   | 0.08          | Pentanoic acid, 4-oxo-                   |
| 20          | 33.796               | 1877955   | 0.06          | 9-Octadecenoic acid, methyl ester        |
| 21          | 34.031               | 2338725   | 0.07          | Pentadecanoic acid, ethyl ester          |
| 22          | 34.127               | 1150014   | 0.04          | Tetrahydrofuran, 2-ethyl-5-butyl-        |
| 23          | 34.321               | 15836541  | 0.50          | 9-Octadecenoic acid, ethyl ester         |
| 24          | 34.441               | 1176772   | 0.04          | (E)-9-Octadecenoic acid ethyl ester      |

---

|    |        |            |       |                                           |
|----|--------|------------|-------|-------------------------------------------|
| 25 | 34.520 | 2707044    | 0.09  | 9,12-Octadecadienoic acid, methyl ester   |
| 26 | 35.019 | 21241814   | 0.67  | 9,12-Octadecadienoic acid, ethyl ester    |
| 27 | 35.303 | 1419645    | 0.04  | Benzeneacetic acid                        |
| 28 | 35.589 | 3929671    | 0.12  | 2-Pentenoic acid, 3-methyl-, methyl ester |
| 29 | 37.157 | 11811116   | 0.37  | Tetradecanoic acid                        |
| 30 | 37.640 | 2960807    | 0.09  | Fumaric acid, ethyl 2-methylallyl ester   |
| 31 | 37.996 | 3884578    | 0.12  | E, Z-2,13-Octadecadien-1-ol acetate       |
| 32 | 38.470 | 77243538   | 2.43  | Pentadecanoic acid                        |
| 33 | 40.048 | 680111990  | 21.40 | n-Hexadecanoic acid                       |
| 34 | 40.496 | 24093068   | 0.76  | 9-Hexadecenoic acid                       |
| 35 | 41.509 | 13216611   | 0.42  | cis-10-Nonadecenoic acid                  |
| 36 | 43.822 | 220917785  | 6.95  | Octadecanoic acid                         |
| 37 | 44.596 | 952243756  | 29.97 | 9-Octadecenoic acid                       |
| 38 | 45.980 | 1103326653 | 34.72 | 9,12-Octadecadienoic acid (Z, Z)-         |

---
